# Supplementary material for: The effect of 2D tungsten disulfide nanoparticles on Lewis lung carcinoma cells in vitro
Source: Royal Society of Chemistry journal article supplement (doi:10.1039/d1ra01469b), 2021-01-01
Supplement: d1ra01469b1.pdf [file d1ra01469b1.pdf]

## *Supplementary Information*

### **The effect of 2D tungsten disulfide nanoparticles on Lewis lung carcinoma cells in vitro**

D.L. Kolesnik<sup>a</sup>, O.N. Pyaskovskaya<sup>a</sup>, O.P. Gnatyuk<sup>\*b</sup>, V.V. Cherepanov<sup>b</sup>, S.O. Karakhim<sup>c</sup>, I.O. Polovii<sup>b</sup>, O.Yu.Posudievsky<sup>d</sup>, N.V.Konoshchuk<sup>d</sup>, V.V.Strelchuk<sup>e</sup>, A.S.Nikolenko<sup>e</sup>, G.I.Dovbeshko<sup>b</sup>, G.I.Solyanik<sup>a</sup>

- a. R.E. Kavetsky Institute of Experimental Pathology, Oncology and Radiobiology, National Academy of Sciences of Ukraine, 45 Vasylykivska str., Kyiv, Ukraine, 03022.
- b. Department of Physics of Biological Systems, Institute of Physics of the National Academy of Sciences of Ukraine, Prospekt Nauki 46, Kyiv 03028, Ukraine; e-mail: hrysantemka@gmail.com
- c. . Palladin Institute of Biochemistry of the National Academy of Sciences of Ukraine, Leontovicha Street 9, Kyiv 01601, Ukraine.
- d. L.V. Pisarzhevsky Institute of Physical Chemistry of the National Academy of Sciences of Ukraine, Prospekt Nauki 31, Kyiv 03028, Ukraine.
- e. V.E. Lashkaryev Institute of Semiconductor Physics of the National Academy of Sciences of Ukraine, Prospekt Nauki 41, Kyiv 03028, Ukraine

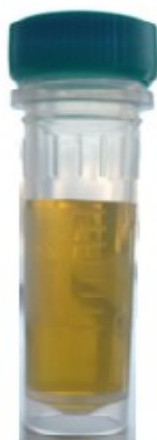

**Figure S1.** Aqueous solution of WS<sub>2</sub> (0,1 mg/ml).

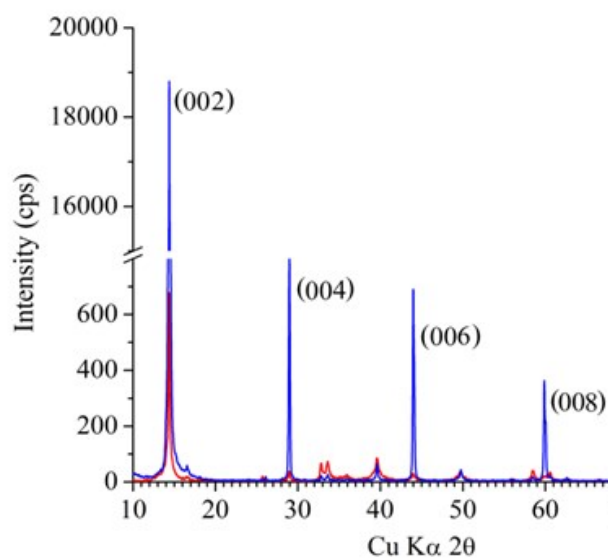

**Figure S2.** XRD of mechanochemically treated WS<sub>2</sub> nanoparticles (blue — before, and red — after treatment). Indexation was performed according to PDF2 08-0237. [O.Yu. Posudievsky, O.A. Khazieieva, A.S. Kondratyuk, V.V. Cherepanov, G.I. Dovbeshko, V.G. Koshechko and V.D. Pokhodenko, Nanotechnology, 2018, 29, 085704. doi:10.1088/1361-6528/aaa381 ]

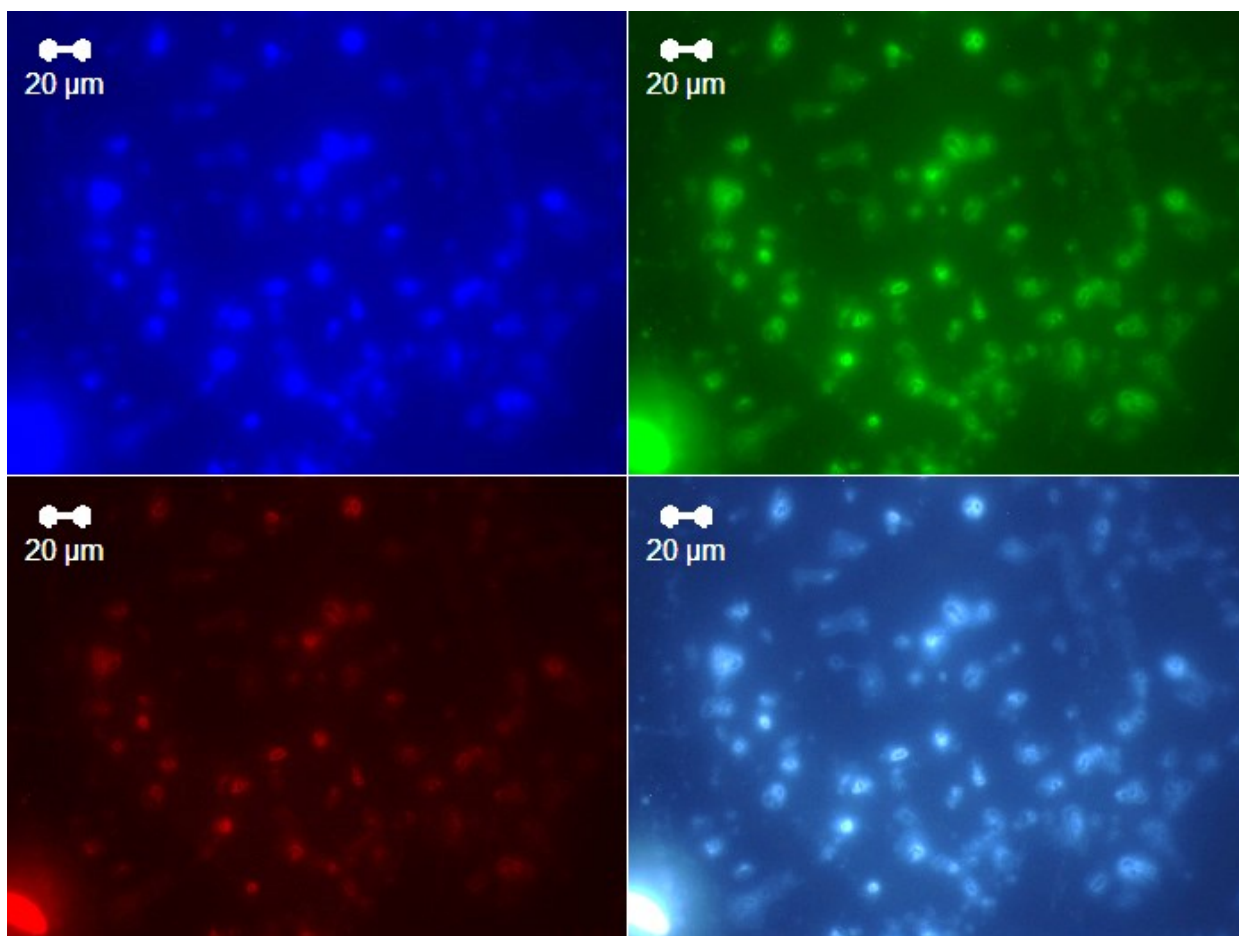

**Figure S3.** Confocal microscopy images of WS2 nanoparticles on a gold substrate; (a) transmission (excitation was provided by 405 nm diode laser) and (b) fluorescent (excitation 365 nm, Hg lamp HBO-100) images of 2D WS2 nanoparticles; Raman spectrum of 2D WS2 nanoparticles,  $\lambda_{exc}= 488$  nm (c)

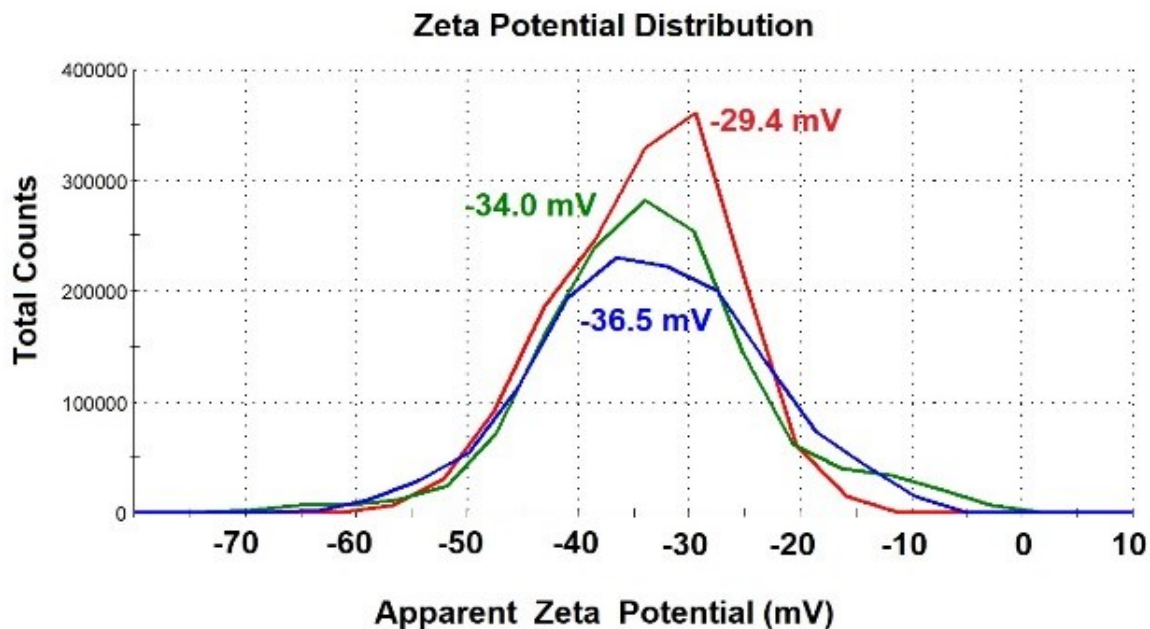

**Figure S4.** Z-potential distribution of 2D-WS2 nanoparticles.

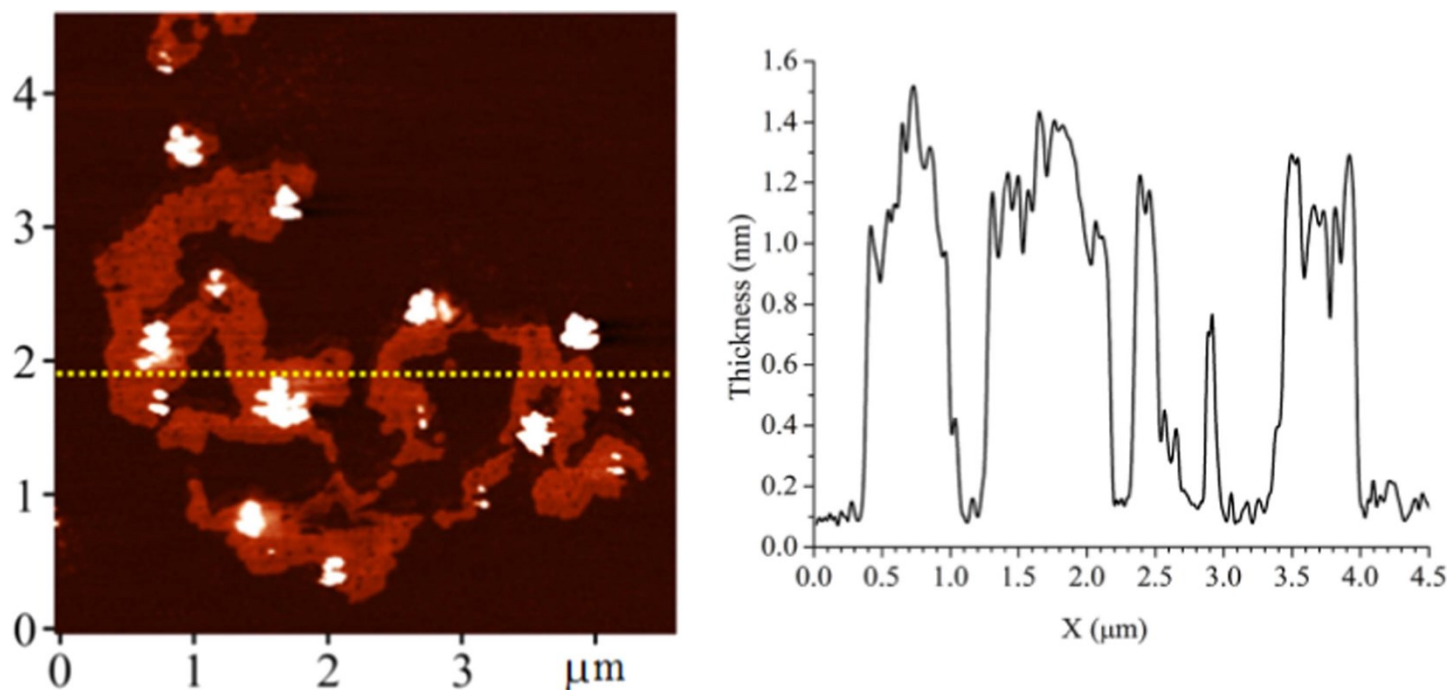

**Figure S5.** AFM image and cross-section profile for aggregate of 1H-WS2 nanoparticles deposited on the surface of the mica from dispersion. in EtOH. [O.Yu. Posudievsky, O.A. Khazieieva, A.S. Kondratyuk, V.V. Cherepanov, G.I. Dovbeshko, V.G. Koshechko and V.D. Pokhodenko, *Nanotechnology*, 2018, 29, 085704. doi:10.1088/1361-6528/aaa381 ]
